# Supplementary material for: Immunohistochemical Expression of Epithelial Cell Adhesion Molecule (EpCAM) in Salivary Gland Cancer: Correlation with the Biological Behavior
Source: MDPI journal article supplement (doi:10.3390/diagnostics13162652), 2023-08-11
Supplement: s1 [file s1]

|                                    | n  | Intensity Score (IS) |               |                   |                 | p-value | n  | Proportion Score (PS)             |                                     |                                       |                                       |                                     | p-value | n  | Total Immunostaining Score (TIS) |               |                   |                 | p-value |
|------------------------------------|----|----------------------|---------------|-------------------|-----------------|---------|----|-----------------------------------|-------------------------------------|---------------------------------------|---------------------------------------|-------------------------------------|---------|----|----------------------------------|---------------|-------------------|-----------------|---------|
|                                    |    | 0                    | 1             | 2                 | 3               |         |    | 0                                 | 1                                   | 2                                     | 3                                     | 4                                   |         |    | 0 1,4                            | 6,8           | 9,12              |                 |         |
|                                    |    | no staining          | weak staining | moderate staining | strong staining |         |    | 0% positively stained tumor cells | <10% positively stained tumor cells | 10-50% positively stained tumor cells | 51-80% positively stained tumor cells | >80% positively stained tumor cells |         |    | no staining                      | weak staining | moderate staining | strong staining |         |
| Histopathological subtypes of SGC  |    |                      |               |                   |                 |         |    |                                   |                                     |                                       |                                       |                                     |         |    |                                  |               |                   |                 |         |
| Adenocarcinoma (NOS)               | 4  | 0 (0.0)              | 3 (75.0)      | 1 (25.0)          | 0 (0.0)         |         | 4  | 0 (0.0)                           | 3 (75.0)                            | 1 (25.0)                              | 0 (0.0)                               | 0 (0.0)                             |         | 4  | 0 (0.0)                          | 4 (100.0)     | 0 (0.0)           | 0 (0.0)         |         |
| Adenoid cystic carcinoma (AdCC)    | 18 | 0 (0.0)              | 1 (5.6)       | 12 (66.7)         | 5 (27.8)        |         | 18 | 0 (0.0)                           | 1 (5.6)                             | 5 (27.8)                              | 9 (50.0)                              | 3 (16.7)                            |         | 18 | 0 (0.0)                          | 6 (33.3)      | 7 (38.9)          | 5 (27.8)        |         |
| Mucoepidermoid carcinoma (MEC)     | 20 | 4 (20.0)             | 4 (20.0)      | 8 (40.0)          | 4 (20.0)        |         | 20 | 4 (20.0)                          | 4 (20.0)                            | 7 (35.0)                              | 1 (5.0)                               | 4 (20.0)                            |         | 20 | 4 (20.0)                         | 11 (55.0)     | 1 (5.0)           | 4 (20.0)        |         |
| Polymorphous adenocarcinoma (PAC)  | 9  | 2 (22.2)             | 6 (66.7)      | 1 (11.1)          | 0 (0.0)         |         | 9  | 2 (22.2)                          | 6 (66.7)                            | 1 (11.1)                              | 0 (0.0)                               | 0 (0.0)                             |         | 9  | 2 (22.2)                         | 6 (66.7)      | 1 (11.1)          | 0 (0.0)         |         |
| Epithelial-myoepithelial carcinoma | 5  | 1 (20.0)             | 2 (40.0)      | 2 (40.0)          | 0 (0.0)         | <0.001  | 5  | 1 (20.0)                          | 3 (60.0)                            | 0 (0.0)                               | 1 (20.0)                              | 0 (0.0)                             | <0.001  | 5  | 1 (20.0)                         | 3 (60.0)      | 1 (20.0)          | 0 (0.0)         | 0.001   |
| Acinic cell carcinoma (AcCC)       | 2  | 1 (50.0)             | 1 (50.0)      | 0 (0.0)           | 0 (0.0)         |         | 2  | 1 (50.0)                          | 1 (50.0)                            | 0 (0.0)                               | 0 (0.0)                               | 0 (0.0)                             |         | 2  | 1 (50.0)                         | 1 (50.0)      | 0 (0.0)           | 0 (0.0)         |         |
| Salivary duct carcinoma            | 5  | 0 (0.0)              | 0 (0.0)       | 0 (0.0)           | 5 (100.0)       |         | 5  | 0 (0.0)                           | 0 (0.0)                             | 0 (0.0)                               | 0 (0.0)                               | 5 (100.0)                           |         | 5  | 0 (0.0)                          | 0 (0.0)       | 0 (0.0)           | 5 (100.0)       |         |
| Carcinoma-ex pleomorphic adenoma   | 2  | 0 (0.0)              | 0 (0.0)       | 1 (50.0)          | 1 (50.0)        |         | 2  | 0 (0.0)                           | 0 (0.0)                             | 0 (0.0)                               | 2 (100.0)                             | 0 (0.0)                             |         | 2  | 0 (0.0)                          | 0 (0.0)       | 1 (50.0)          | 1 (50.0)        |         |
| Age                                |    |                      |               |                   |                 |         |    |                                   |                                     |                                       |                                       |                                     |         |    |                                  |               |                   |                 |         |
| ≤50                                | 21 | 3 (14.3)             | 6 (28.6)      | 8 (38.1)          | 4 (19.0)        | 0.945   | 21 | 3 (14.3)                          | 6 (28.6)                            | 5 (23.8)                              | 3 (14.3)                              | 4 (19.0)                            | 0.942   | 21 | 3 (14.3)                         | 11 (52.4)     | 3 (14.3)          | 4 (19.0)        | 0.903   |
| >50                                | 44 | 5 (11.4)             | 11 (25.0)     | 17 (38.6)         | 11 (25.0)       |         | 44 | 5 (11.4)                          | 12 (27.3)                           | 8 (18.2)                              | 10 (22.7)                             | 9 (20.5)                            |         | 44 | 5 (11.4)                         | 20 (45.5)     | 8 (18.2)          | 11 (25.0)       |         |
| Gender                             |    |                      |               |                   |                 |         |    |                                   |                                     |                                       |                                       |                                     |         |    |                                  |               |                   |                 |         |
| Male                               | 30 | 1 (3.3)              | 9 (30.0)      | 13 (43.3)         | 7 (23.3)        | 0.225   | 30 | 1 (3.3)                           | 9 (30.0)                            | 8 (26.7)                              | 6 (20.0)                              | 6 (20.0)                            | 0.284   | 30 | 1 (3.3)                          | 17 (56.7)     | 5 (16.7)          | 7 (23.3)        | 0.200   |
| Female                             | 35 | 7 (20.0)             | 8 (22.9)      | 12 (34.3)         | 8 (22.9)        |         | 35 | 7 (20.0)                          | 9 (25.7)                            | 5 (14.3)                              | 7 (20.0)                              | 7 (20.0)                            |         | 35 | 7 (20.0)                         | 14 (40.0)     | 6 (17.1)          | 8 (22.9)        |         |
| Location                           |    |                      |               |                   |                 |         |    |                                   |                                     |                                       |                                       |                                     |         |    |                                  |               |                   |                 |         |
| · Major salivary glands            |    |                      |               |                   |                 |         |    |                                   |                                     |                                       |                                       |                                     |         |    |                                  |               |                   |                 |         |
| Parotid gland                      | 24 | 1 (4.2)              | 7 (29.2)      | 5 (20.8)          | 11 (45.8)       |         | 24 | 1 (4.2)                           | 7 (29.2)                            | 1 (4.2)                               | 6 (25.0)                              | 9 (37.5)                            | 0.051   | 24 | 1 (4.2)                          | 8 (33.3)      | 4 (16.7)          | 11 (45.8)       |         |
| Submandibular gland                | 4  | 1 (25.0)             | 0 (0.0)       | 3 (75.0)          | 0 (0.0)         | 0.027   | 4  | 1 (25.0)                          | 0 (0.0)                             | 1 (25.0)                              | 2 (50.0)                              | 0 (0.0)                             |         | 4  | 1 (25.0)                         | 1 (25.0)      | 2 (50.0)          | 0 (0.0)         | 0.116   |
| Sublingual gland                   | 2  | 0 (0.0)              | 0 (0.0)       | 2 (100.0)         | 0 (0.0)         |         | 2  | 0 (0.0)                           | 0 (0.0)                             | 1 (50.0)                              | 1 (50.0)                              | 0 (0.0)                             |         | 2  | 0 (0.0)                          | 1 (50.0)      | 1 (50.0)          | 0 (0.0)         |         |
| · Minor salivary glands            |    |                      |               |                   |                 |         |    |                                   |                                     |                                       |                                       |                                     |         |    |                                  |               |                   |                 |         |
| Palate                             | 21 | 3 (14.3)             | 7 (33.3)      | 9 (42.9)          | 2 (9.5)         |         | 21 | 3 (14.3)                          | 8 (38.1)                            | 6 (28.6)                              | 3 (14.3)                              | 1 (4.8)                             |         | 21 | 3 (14.3)                         | 14 (66.7)     | 2 (9.5)           | 2 (9.5)         |         |
| Tongue/Floor of mouth              | 4  | 0 (0.0)              | 0 (0.0)       | 3 (75.0)          | 1 (25.0)        |         | 4  | 0 (0.0)                           | 0 (0.0)                             | 2 (50.0)                              | 1 (25.0)                              | 1 (25.0)                            |         | 4  | 0 (0.0)                          | 2 (50.0)      | 1 (25.0)          | 1 (25.0)        | 0.416   |
| Upper lip                          | 2  | 1 (50.0)             | 0 (0.0)       | 1 (50.0)          | 0 (0.0)         | 0.433   | 2  | 1 (50.0)                          | 0 (0.0)                             | 0 (0.0)                               | 0 (0.0)                               | 1 (50.0)                            | 0.390   | 2  | 1 (50.0)                         | 0 (0.0)       | 0 (0.0)           | 0 (0.0)         |         |
| Lower lip                          | 2  | 0 (0.0)              | 0 (0.0)       | 1 (50.0)          | 1 (50.0)        |         | 2  | 0 (0.0)                           | 0 (0.0)                             | 1 (50.0)                              | 0 (0.0)                               | 1 (50.0)                            |         | 2  | 0 (0.0)                          | 1 (50.0)      | 1 (50.0)          | 1 (50.0)        |         |
| Retromolar mucosa                  | 3  | 1 (33.3)             | 2 (66.7)      | 0 (0.0)           | 0 (0.0)         |         | 3  | 1 (33.3)                          | 2 (66.7)                            | 0 (0.0)                               | 0 (0.0)                               | 0 (0.0)                             |         | 3  | 1 (33.3)                         | 2 (66.7)      | 0 (0.0)           | 0 (0.0)         |         |
| Buccal mucosa                      | 3  | 1 (33.3)             | 1 (33.3)      | 1 (33.3)          | 0 (0.0)         |         | 3  | 1 (33.3)                          | 1 (33.3)                            | 1 (33.3)                              | 0 (0.0)                               | 0 (0.0)                             |         | 3  | 1 (33.3)                         | 2 (66.7)      | 0 (0.0)           | 0 (0.0)         |         |
| Recurrence                         |    |                      |               |                   |                 |         |    |                                   |                                     |                                       |                                       |                                     |         |    |                                  |               |                   |                 |         |
| Local recurrence                   |    |                      |               |                   |                 |         |    |                                   |                                     |                                       |                                       |                                     |         |    |                                  |               |                   |                 |         |
| Present                            | 6  | 0 (0.0)              | 0 (0.0)       | 1 (16.7)          | 5 (83.3)        | 0.006   | 6  | 0 (0.0)                           | 0 (0.0)                             | 0 (0.0)                               | 12 (20.3)                             | 5 (83.3)                            | 0.004   | 6  | 0 (0.0)                          | 0 (0.0)       | 1 (16.7)          | 5 (83.3)        | 0.003   |
| Absent                             | 59 | 8 (13.6)             | 17 (28.8)     | 24 (40.7)         | 10 (16.9)       |         | 59 | 8 (13.8)                          | 18 (30.5)                           | 13 (22.0)                             | 1 (16.7)                              | 8 (13.6)                            |         | 59 | 8 (13.6)                         | 31 (52.5)     | 10 (16.9)         | 10 (16.9)       |         |
| Distant metastasis                 |    |                      |               |                   |                 |         |    |                                   |                                     |                                       |                                       |                                     |         |    |                                  |               |                   |                 |         |
| Present                            | 24 | 1 (4.2)              | 0 (0.0)       | 12 (50.0)         | 11 (45.8)       | <0.001  | 24 | 1 (4.2)                           | 0 (0.0)                             | 3 (12.5)                              | 9 (37.5)                              | 11 (45.8)                           | <0.001  | 24 | 1 (4.2)                          | 3 (12.5)      | 9 (37.5)          | 11 (45.8)       | <0.001  |
| Absent                             | 41 | 7 (17.1)             | 17 (41.5)     | 13 (31.7)         | 4 (9.8)         |         | 41 | 7 (17.1)                          | 18 (43.9)                           | 10 (24.4)                             | 4 (9.8)                               | 2 (4.9)                             |         | 41 | 7 (17.1)                         | 28 (68.3)     | 2 (4.9)           | 4 (9.8)         |         |
| Perineural Invasion                |    |                      |               |                   |                 |         |    |                                   |                                     |                                       |                                       |                                     |         |    |                                  |               |                   |                 |         |
| Present                            | 29 | 3 (10.3)             | 0 (0.0)       | 13 (44.8)         | 13 (44.8)       | <0.001  | 29 | 3 (10.3)                          | 0 (0.0)                             | 5 (17.2)                              | 8 (27.6)                              | 13 (44.8)                           | <0.001  | 29 | 3 (10.3)                         | 5 (17.2)      | 8 (27.6)          | 13 (44.8)       | <0.001  |
| Absent                             | 36 | 5 (13.9)             | 17 (47.2)     | 12 (33.3)         | 2 (5.6)         |         | 36 | 5 (13.9)                          | 18 (50.0)                           | 8 (22.2)                              | 5 (13.9)                              | 0 (0.0)                             |         | 36 | 5 (13.9)                         | 26 (72.2)     | 3 (8.3)           | 2 (5.6)         |         |
| Vascular invasion                  |    |                      |               |                   |                 |         |    |                                   |                                     |                                       |                                       |                                     |         |    |                                  |               |                   |                 |         |
| Present                            | 27 | 1 (3.7)              | 1 (3.7)       | 13 (48.1)         | 12 (44.4)       | <0.001  | 27 | 1 (3.7)                           | 1 (3.7)                             | 8 (29.6)                              | 5 (18.5)                              | 12 (44.4)                           | <0.001  | 27 | 1 (3.7)                          | 9 (33.3)      | 5 (18.5)          | 12 (44.4)       | 0.002   |
| Absent                             | 38 | 7 (18.4)             | 16 (42.1)     | 12 (31.6)         | 3 (7.9)         |         | 38 | 7 (18.4)                          | 17 (44.7)                           | 5 (13.2)                              | 8 (21.1)                              | 1 (2.6)                             |         | 38 | 7 (18.4)                         | 22 (57.9)     | 6 (15.8)          | 3 (7.9)         |         |
| Bone invasion                      |    |                      |               |                   |                 |         |    |                                   |                                     |                                       |                                       |                                     |         |    |                                  |               |                   |                 |         |
| Present                            | 9  | 1 (11.1)             | 1 (11.1)      | 5 (55.6)          | 2 (22.2)        | 0.713   | 9  | 1 (11.1)                          | 1 (11.1)                            | 5 (55.6)                              | 1 (11.1)                              | 1 (11.1)                            | 0.119   | 9  | 1 (11.1)                         | 6 (66.7)      | 0 (0.0)           | 2 (22.2)        | 0.503   |
| Absent                             | 56 | 7 (12.5)             | 16 (28.6)     | 20 (35.7)         | 13 (23.2)       |         | 56 | 7 (12.5)                          | 17 (30.4)                           | 8 (14.3)                              | 12 (21.4)                             | 12 (21.4)                           |         | 56 | 7 (12.5)                         | 25 (44.6)     | 11 (19.6)         | 13 (23.2)       |         |
| Muscle invasion                    |    |                      |               |                   |                 |         |    |                                   |                                     |                                       |                                       |                                     |         |    |                                  |               |                   |                 |         |
| Present                            | 35 | 6 (17.1)             | 6 (17.1)      | 15 (42.9)         | 8 (22.9)        | 0.255   | 35 | 6 (17.1)                          | 6 (17.1)                            | 11 (31.4)                             | 4 (11.4)                              | 8 (22.9)                            | 0.013   | 35 | 6 (17.1)                         | 14 (46.7)     | 4 (11.4)          | 8 (22.9)        | 0.453   |
| Absent                             | 30 | 2 (6.7)              | 11 (36.7)     | 10 (33.3)         | 7 (23.3)        |         | 30 | 2 (6.7)                           | 12 (40.0)                           | 2 (6.7)                               | 9 (30.0)                              | 5 (16.7)                            |         | 30 | 2 (6.7)                          | 17 (48.6)     | 7 (23.3)          | 7 (23.3)        |         |

Figure S1. EpCAM expression by IS, TIS and clinicopathological parameters in salivary gland cancer (SCG).
